# Supplementary material for: High MCM8 expression correlates with unfavorable prognosis and induces immune cell infiltration in hepatocellular carcinoma
Source: Aging (Albany NY). 2022 Dec 27;14(24):10027–49. doi: 10.18632/aging.204440 (PMC9831725; doi:10.18632/aging.204440)
Supplement: Supplementary Figure 1 [file aging-14-204440-s001.pdf]

SUPPLEMENTARY FIGURE

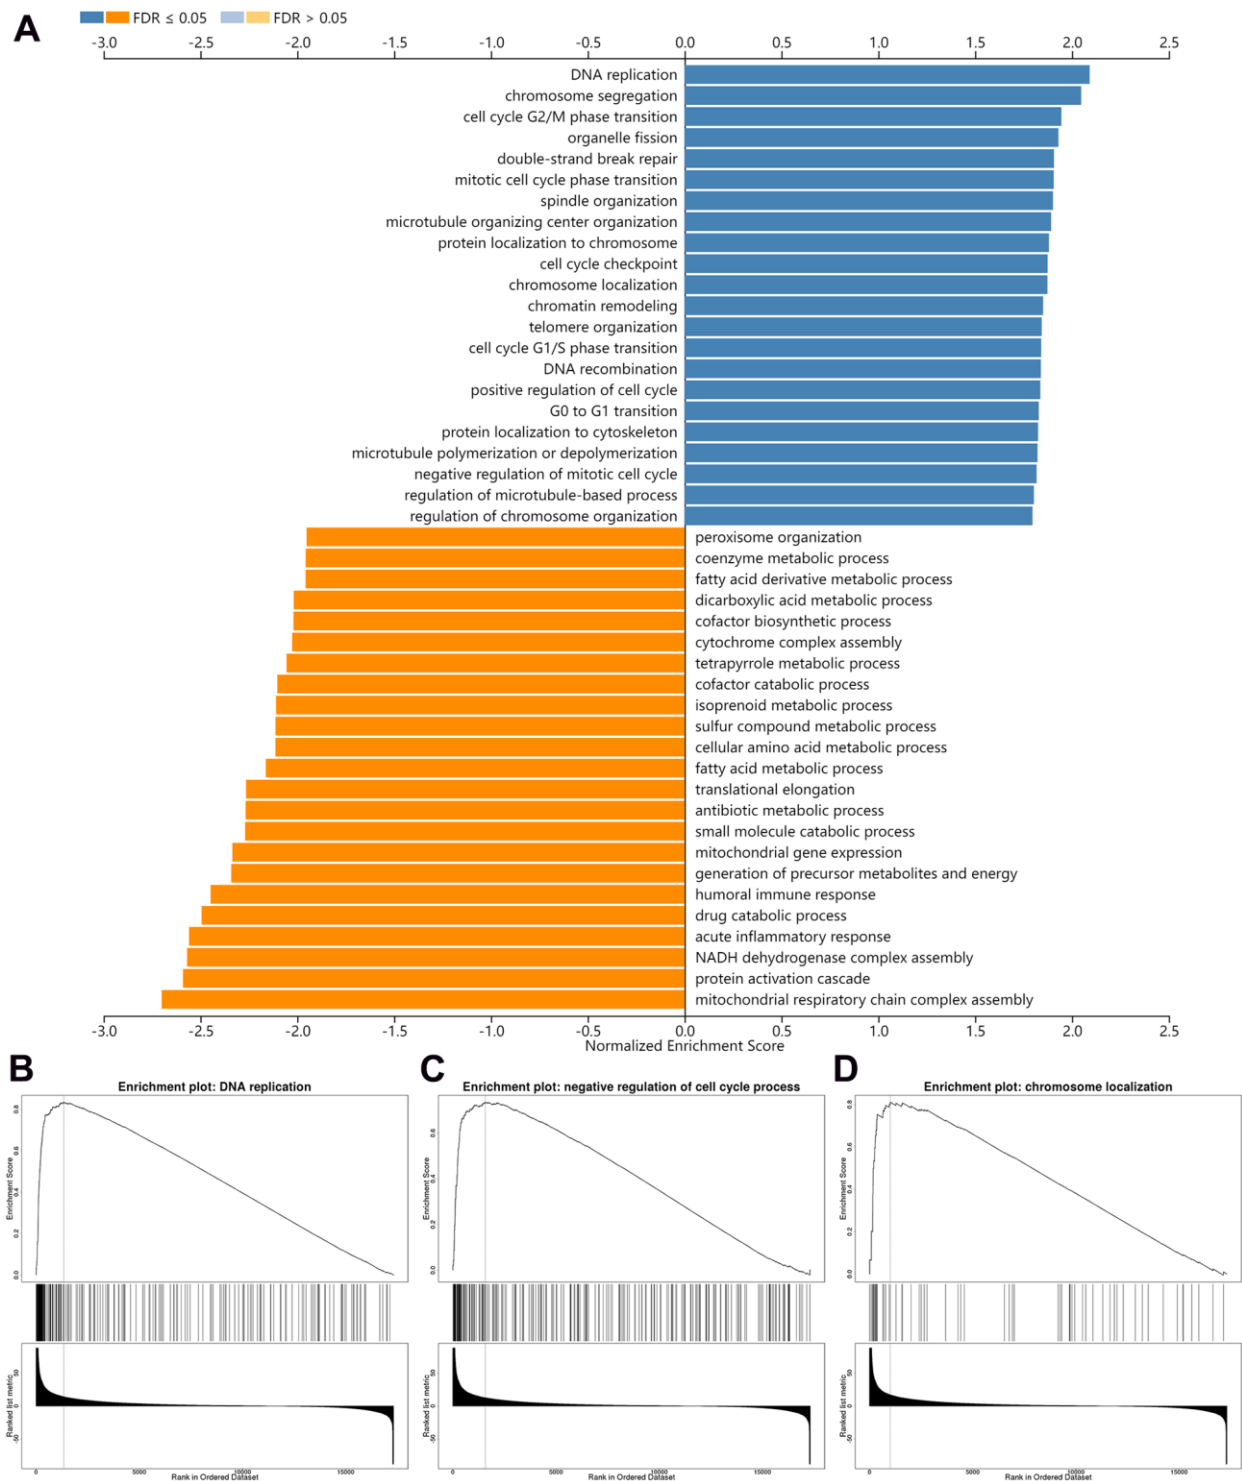

**Supplementary Figure 1. Gene set enrichment analyses (GSEA) and gene set variation analyses (GSVA) to illustrate the biological processes related to MCM8. (A) Barplot of GSVA results of top 50 biological processes that MCM8 related. (B–D) GSEA results of the “DNA replication”, “chromosome segregation”, and “cell cycle”.**
